# Supplementary material for: Emergency Department Use Following Pediatric Psychiatric Hospitalization
Source: Atypon-hosted journal article supplement (doi:10.1176/appi.ps.201800441), 2019-04-23

**Online Appendices****Online Appendix 1.**

In a secondary analysis, we identified one moderation effect between predictors in the preliminary main effects model. In the LOS interaction model shown in **Online Supplemental Table 2**, the main effect of generalized anxiety disorder (GAD) on ED utilization is moderated by hospital LOS ( $z=-2.82$ ,  $p=0.005$ ). AUC statistics and a likelihood ratio test ( $X^2(1)=13.16$ ,  $p<0.001$ ) suggest that the LOS interaction model provides a better fit than the preliminary main effects model.

In the LOS interaction model, number of trauma types, GAD and hospital LOS continued to predict ED utilization. As shown in **Online Supplemental Figure 1**, the LOS interaction model predicts that patients with no documented trauma have a 5% risk of ED utilization, while patients with 5 documented types of trauma have a 78% risk of ED utilization (a >16-fold increased risk), when holding LOS constant at the observed mean of 14.2 days, in patients with no GAD diagnosis.

As **Online Supplemental Figure 2** demonstrates, GAD moderates the effect of hospital LOS on ED utilization. Specifically, the model predicts that the risk of ED utilization within 30 days of discharge is 2% for patients without a GAD diagnosis and hospital LOS of 1 day, while that risk increases to 95% in patients without a GAD diagnosis and a hospital LOS of 70 days when holding number of trauma types constant at the mean. When holding number of trauma types constant at the mean, the risk of ED utilization within 30 days of discharge is 54% for patients with a GAD diagnosis and LOS of 1 day; this risk decreases to 2% in patients with a GAD diagnosis and an LOS of 70 days. Overall, these results indicate a clinically significant interaction; ED utilization decreases as LOS increases in patients with GAD, whereas this relationship is inverted in clinical subgroups without GAD.

After identifying that GAD moderated the association between LOS and ED utilization, we formulated the *post hoc* hypothesis that GAD might also moderate the association between discharge disposition and ED utilization. This was confirmed by the data ( $z=-1.98$ ,  $p=0.048$ ). The interaction between discharge disposition and GAD in the PHP interaction model is illustrated in **Online Supplemental Figure 3**. In the PHP interaction model, patients with a GAD diagnosis who are discharged to home with outpatient therapy have an elevated (51%) risk of ED utilization as compared to those without GAD (8% risk). However, if discharged to home with participation in a PHP, patients with GAD have a 17% risk of ED utilization compared to patients without GAD who have a 15% risk.

**Online Supplemental Table 1. Univariate predictors of emergency department utilization within 30 days of discharge**

|                                                     | n   | Odds Ratio | OR 95% C.I. | z value | p-value |
|-----------------------------------------------------|-----|------------|-------------|---------|---------|
| <b>Demographics</b>                                 |     |            |             |         |         |
| Sex (reference: male)                               | 116 | 1.82       | 1.02 - 3.26 | 0.85    | 0.393   |
| Age at admission                                    |     | 1.09       | 0.96 - 1.23 | 0.36    | 0.721   |
| Caucasian (reference: other ethnicities)            | 115 | 1.89       | 1.06 - 3.39 | 0.93    | 0.354   |
| Adopted (reference: not adopted)                    | 13  | 2.67       | 1.40 - 5.10 | 1.67    | 0.095   |
| <b>Admission</b>                                    |     |            |             |         |         |
| Admitted for harm to self                           | 120 | +inf       | 0.00 - +inf | 0.01    | 0.989   |
| Admitted for harm to others                         | 26  | 0.46       | 0.21 - 1.01 | -0.94   | 0.350   |
| Admitted for functional decline                     | 114 | 0.63       | 0.38 - 1.04 | -0.90   | 0.369   |
| History of head injury (reference: no head injury)  | 20  | 1.01       | 0.52 - 1.99 | 0.01    | 0.992   |
| Total reported trauma types                         |     | 1.64       | 1.30 - 2.06 | 2.16    | 0.031   |
| <b>Treatment</b>                                    |     |            |             |         |         |
| Length of hospital stay                             |     | 1.04       | 1.03 - 1.06 | 2.70    | 0.007   |
| Partial hospitalization program (reference: no PHP) | 68  | 0.94       | 0.60 - 1.47 | 0.18    | 0.856   |
| <b>Diagnosis</b>                                    |     |            |             |         |         |
| Mood disorder NOS                                   | 18  | 2.39       | 1.34 - 4.27 | 1.49    | 0.137   |
| Bipolar disorder                                    | 14  | 0.83       | 0.37 - 1.83 | -0.14   | 0.886   |
| Depressive disorder                                 | 94  | 0.88       | 0.55 - 1.41 | -0.33   | 0.743   |
| Anxiety disorder                                    | 59  | 1.21       | 0.77 - 1.89 | 0.37    | 0.709   |
| Obsessive-compulsive disorder                       | 7   | 2.29       | 0.96 - 5.46 | 0.95    | 0.344   |
| Eating disorder                                     | 8   | 0.00       | 0.00 - +inf | -0.01   | 0.991   |
| Schizophrenia or psychotic disorder                 | 2   | 0.00       | 0.00 - +inf | -0.01   | 0.989   |
| Substance abuse                                     | 4   | 1.86       | 0.57 - 6.02 | 0.52    | 0.605   |
| Neurodevelopmental disorder                         | 38  | 0.36       | 0.19 - 0.69 | -1.49   | 0.137   |
| ADHD                                                | 27  | 0.37       | 0.17 - 0.79 | -1.26   | 0.207   |
| DMDD                                                | 6   | 2.89       | 1.18 - 7.07 | 1.17    | 0.240   |
| Generalized anxiety disorder                        | 22  | 3.35       | 2.02 - 5.56 | 2.20    | 0.028   |
| Panic disorder                                      | 5   | 0.00       | 0.00 - +inf | -0.01   | 0.989   |
| PTSD                                                | 8   | 1.61       | 0.70 - 3.71 | 0.74    | 0.457   |
| Autism spectrum disorder                            | 11  | 0.00       | 0.00 - +inf | -0.01   | 0.989   |
| <b>BPRS-C</b>                                       |     |            |             |         |         |
| Behavior problems                                   |     | 1.09       | 1.02 - 1.16 | 1.22    | 0.223   |
| Depression                                          |     | 1.01       | 0.94 - 1.07 | 0.15    | 0.882   |
| Thinking disturbance                                |     | 0.85       | 0.72 - 1.00 | -0.89   | 0.375   |
| Psychomotor                                         |     | 0.94       | 0.85 - 1.03 | -0.48   | 0.634   |
| Withdrawal                                          |     | 0.99       | 0.92 - 1.06 | 0.19    | 0.852   |
| Anxiety                                             |     | 1.03       | 0.96 - 1.11 | 0.43    | 0.668   |
| Organicity                                          |     | 0.00       | 0.00 - +inf | -0.01   | 0.991   |

Note: \*p<.05

**Online Supplemental Table 2. Multivariate logistic regression interaction models predicting emergency department utilization**

|                                           | Predictor Statistics |          |   |        |         |        | Model Statistics |      |     |  |
|-------------------------------------------|----------------------|----------|---|--------|---------|--------|------------------|------|-----|--|
|                                           | Odds Ratio           | 95% C.I. |   | Z      | p-value | AIC    | -2LL             | AUC  | df  |  |
| <b>LOS Interaction model (n=141)</b>      |                      |          |   |        |         | 101.70 | -45.85           | 0.75 | 136 |  |
| Number of trauma types                    | 2.35                 | 1.80     | - | 3.08   | 3.18    | 0.001  |                  |      |     |  |
| GAD                                       | 58.69                | 19.89    | - | 173.16 | 3.76    | 0.000  |                  |      |     |  |
| LOS                                       | 1.10                 | 1.07     | - | 1.13   | 3.80    | 0.000  |                  |      |     |  |
| LOS*GAD                                   | 0.86                 | 0.81     | - | 0.90   | -2.82   | 0.005  |                  |      |     |  |
| Intercept                                 | 0.01                 | 0.01     | - | 0.03   | -5.95   | 0.001  |                  |      |     |  |
| <b>Post hoc interaction model (n=141)</b> |                      |          |   |        |         | 118.02 | -54.01           | 0.69 | 136 |  |
| Number of trauma types                    | 1.80                 | 1.41     | - | 2.29   | 2.43    | 0.015  |                  |      |     |  |
| GAD                                       | 11.83                | 5.32     | - | 26.31  | 3.09    | 0.002  |                  |      |     |  |
| PHP                                       | 2.05                 | 1.14     | - | 3.68   | 1.22    | 0.222  |                  |      |     |  |
| PHP*GAD                                   | 0.10                 | 0.03     | - | 0.32   | -1.98   | 0.048  |                  |      |     |  |
| Intercept                                 | 0.06                 | 0.03     | - | 0.10   | -5.25   | 0.001  |                  |      |     |  |

\*GAD = Generalized anxiety disorder; LOS = Length of Stay; PHP = Partial hospitalization program

**Online Supplemental Table 3. Characteristics of study sample by 30 day completion status**

|                                    | Complete 30 day survey (n=155) |     |     |        |     | Incomplete 30 day survey (n=87) |     |     |        |     | <i>t</i> or<br><i>X</i> <sup>2</sup> | <i>p</i> -<br>value |
|------------------------------------|--------------------------------|-----|-----|--------|-----|---------------------------------|-----|-----|--------|-----|--------------------------------------|---------------------|
|                                    | n                              | %   | Min | Median | Max | n                               | %   | Min | Median | Max |                                      |                     |
| <b>Demographic</b>                 |                                |     |     |        |     |                                 |     |     |        |     |                                      |                     |
| Female                             | 116                            | 75% |     |        |     | 62                              | 71% |     |        |     | 0.21                                 | 0.651               |
| Age                                |                                |     | 8   | 15     | 18  |                                 |     | 7   | 16     | 18  | 0.29                                 | 0.770               |
| Caucasian                          | 115                            | 74% |     |        |     | 54                              | 62% |     |        |     | 3.33                                 | 0.068               |
| Black                              | 5                              | 3%  |     |        |     | 7                               | 8%  |     |        |     | 1.82                                 | 0.177               |
| Asian                              | 8                              | 5%  |     |        |     | 7                               | 8%  |     |        |     | 0.38                                 | 0.538               |
| Hispanic                           | 7                              | 5%  |     |        |     | 6                               | 7%  |     |        |     | 1.18                                 | 0.278               |
| Other                              | 9                              | 6%  |     |        |     | 8                               | 9%  |     |        |     | 0.53                                 | 0.467               |
| Not documented                     | 17                             | 11% |     |        |     | 8                               | 9%  |     |        |     | 0.05                                 | 0.830               |
| Adopted                            | 13                             | 8%  |     |        |     | 8                               | 9%  |     |        |     | 0.00                                 | 1.000               |
| <b>Admission</b>                   |                                |     |     |        |     |                                 |     |     |        |     |                                      |                     |
| Admitted for risk to self          | 140                            | 90% |     |        |     | 74                              | 85% |     |        |     | 0.61                                 | 0.435               |
| Admitted risk to others            | 26                             | 17% |     |        |     | 11                              | 13% |     |        |     | 0.37                                 | 0.545               |
| Admitted for functional decline    | 114                            | 74% |     |        |     | 53                              | 61% |     |        |     | 3.00                                 | 0.083               |
| Number of trauma types             |                                |     | 0   | 1      | 4   |                                 |     | 0   | 0      | 6   | -0.20                                | 0.840               |
| <b>Diagnosis</b>                   |                                |     |     |        |     |                                 |     |     |        |     |                                      |                     |
| Mood disorder                      | 140                            | 90% |     |        |     | 72                              | 83% |     |        |     | 2.28                                 | 0.131               |
| Depressive disorder                | 107                            | 69% |     |        |     | 49                              | 56% |     |        |     | 3.39                                 | 0.065               |
| Anxiety disorder                   | 65                             | 42% |     |        |     | 28                              | 32% |     |        |     | 1.85                                 | 0.174               |
| Generalized anxiety disorder (GAD) | 25                             | 16% |     |        |     | 14                              | 16% |     |        |     | 0.00                                 | 1.000               |
| Comorbid GAD and mood              | 22                             | 14% |     |        |     | 11                              | 14% |     |        |     | 0.02                                 | 0.887               |
| Neurodevelopmental                 | 40                             | 26% |     |        |     | 14                              | 16% |     |        |     | 2.50                                 | 0.114               |
| <b>Treatment</b>                   |                                |     |     |        |     |                                 |     |     |        |     |                                      |                     |
| Length of stay                     |                                |     | 1   | 11     | 70  |                                 |     | 2   | 9      | 85  | -1.23                                | 0.219               |

**Online Supplemental Figure 1.** Number of trauma types predicting emergency department utilization within 30 days with 95% confidence intervals. (LOS interaction model.)

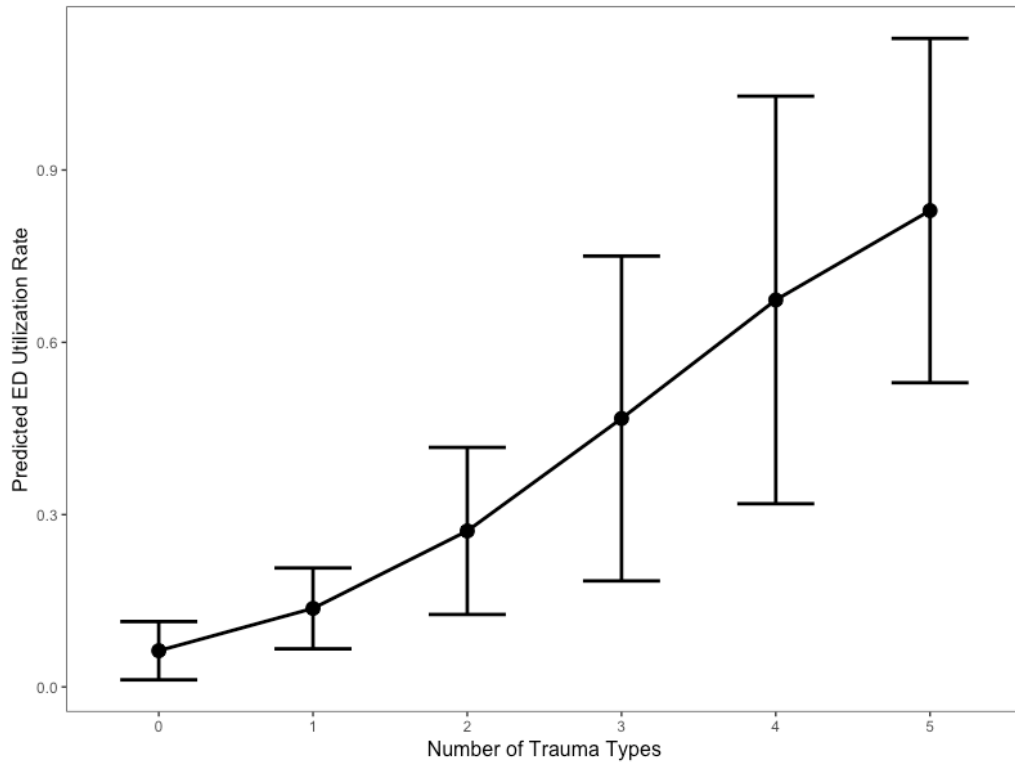

**Online Supplemental Figure 2. GAD moderating Length of stay (in days) on emergency department utilization within 30 days. (LOS interaction model.)**

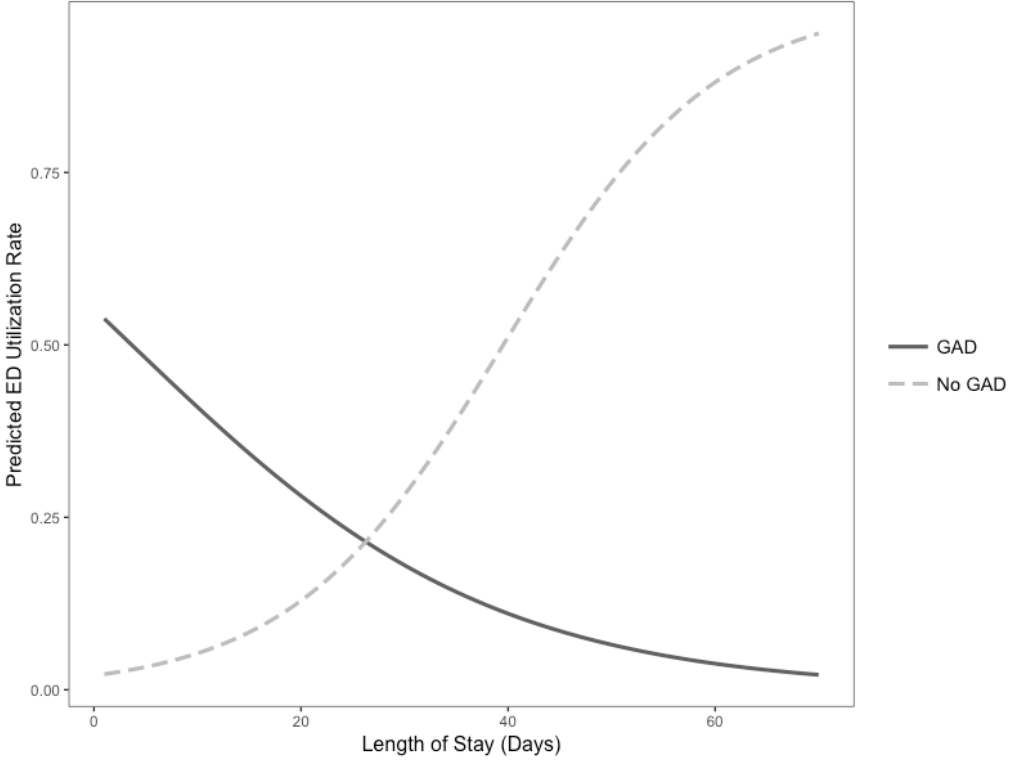

**Online Supplemental Figure 3. Discharge disposition moderating GAD on emergency department utilization within 30 days with 95% confidence intervals. (Post hoc interaction model)**

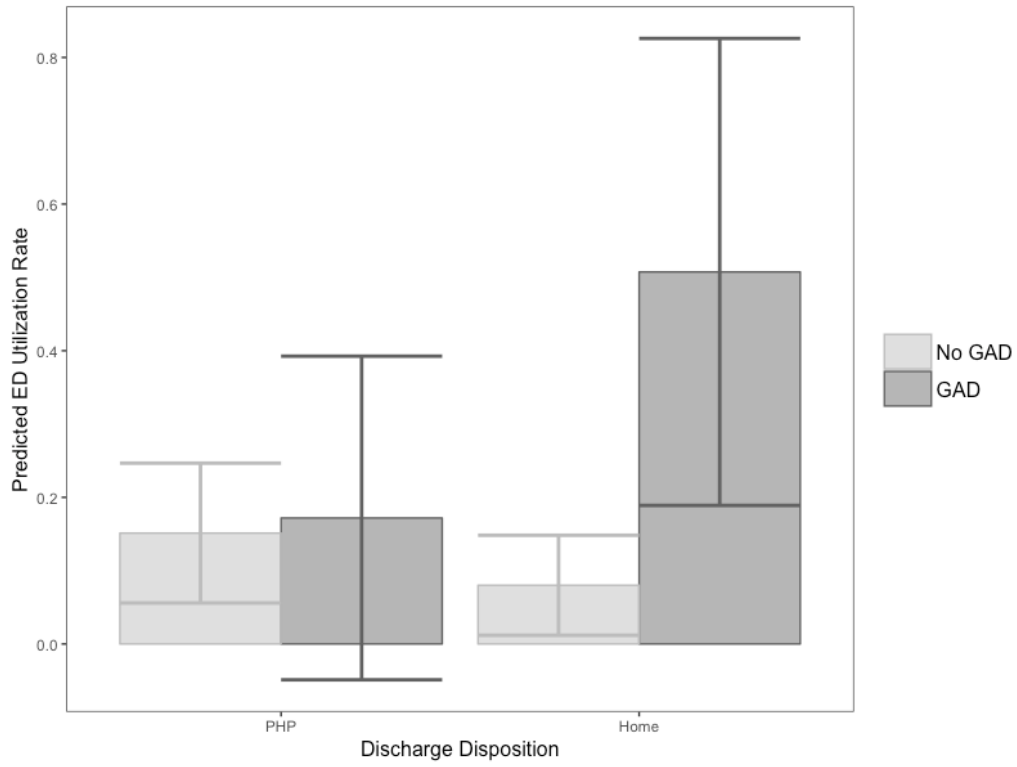

Supplement: appi.ps.201800441.ds001.pdf [file appi.ps.201800441.ds001.pdf]
